# Supplementary material for: CAFs-derived HSPA1A promotes gastric cancer growth and affects chemotherapy by interacting with SEMG1 and regulating glycolysis
Source: Research Square preprint supplement (doi:10.21203/rs.3.rs-8696092/v1), 2026-02-12
Supplement: Supplementary file 1 [file b6e692a10775218d28105f51.docx]

Figure 2B GAPDH

**
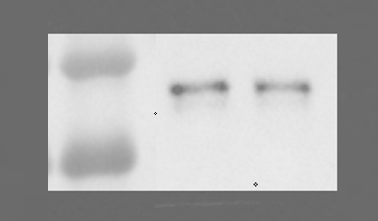
**

Figure 2B HSPA1A

**
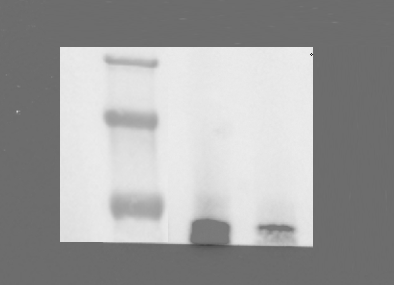
**


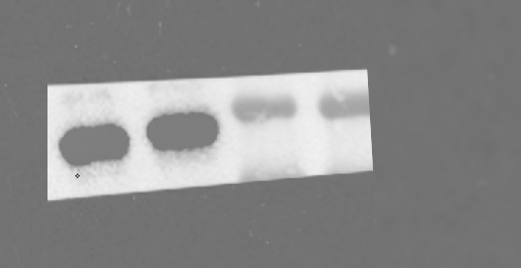


Figure 6C GAPDH


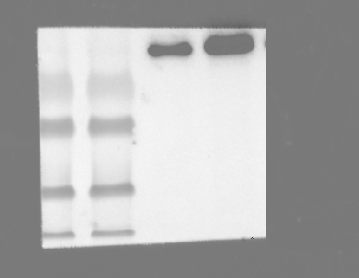


Figure 6C HSPA1A


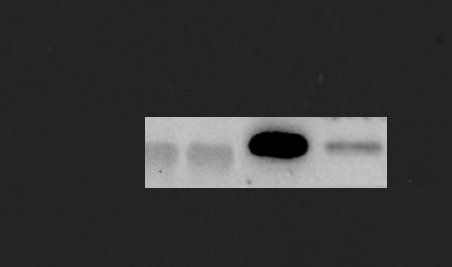


Figure 6C SEMG1


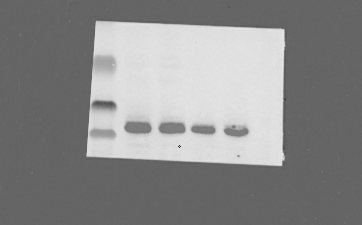


Figure 6F input-HSPA1A


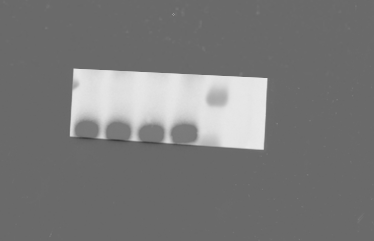


Figure 6F input-SMEG1


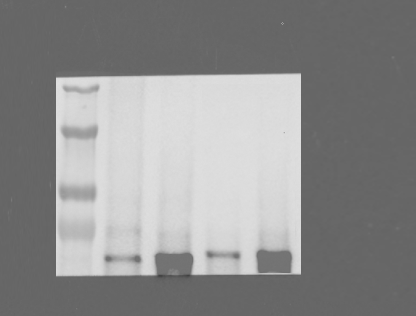


Figure 6F Co-IP HSPA1A


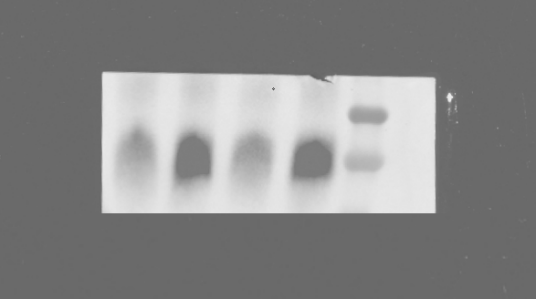


Figure 6F Co-IP SEMG1


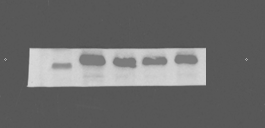


Figure 7A-GADPH


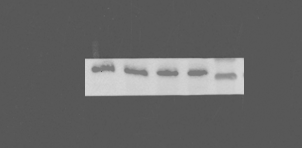


Figure 7A-G6-PD


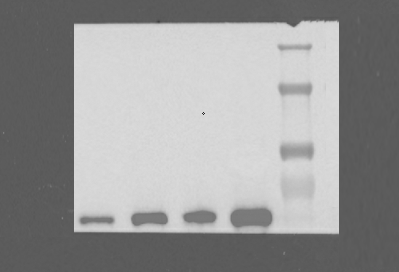


Figure 7A SEMG1


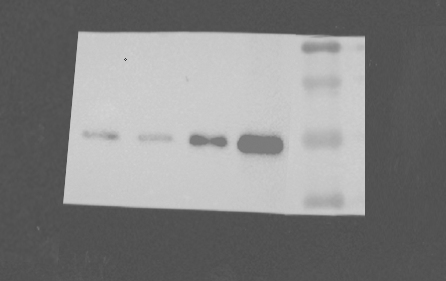


Figure 7A-PKM2


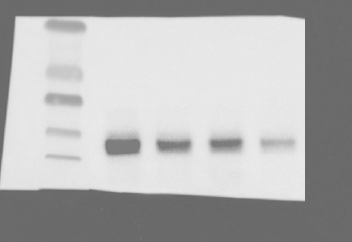


Figure 7A-LDHA
